# Supplementary material
Source: PubMed Central journal article supplement (PMC5943153)
Supplement: NIHMS950097-supplement-Supp_figS1-2.pdf [file NIHMS950097-supplement-Supp_figS1-2.pdf]

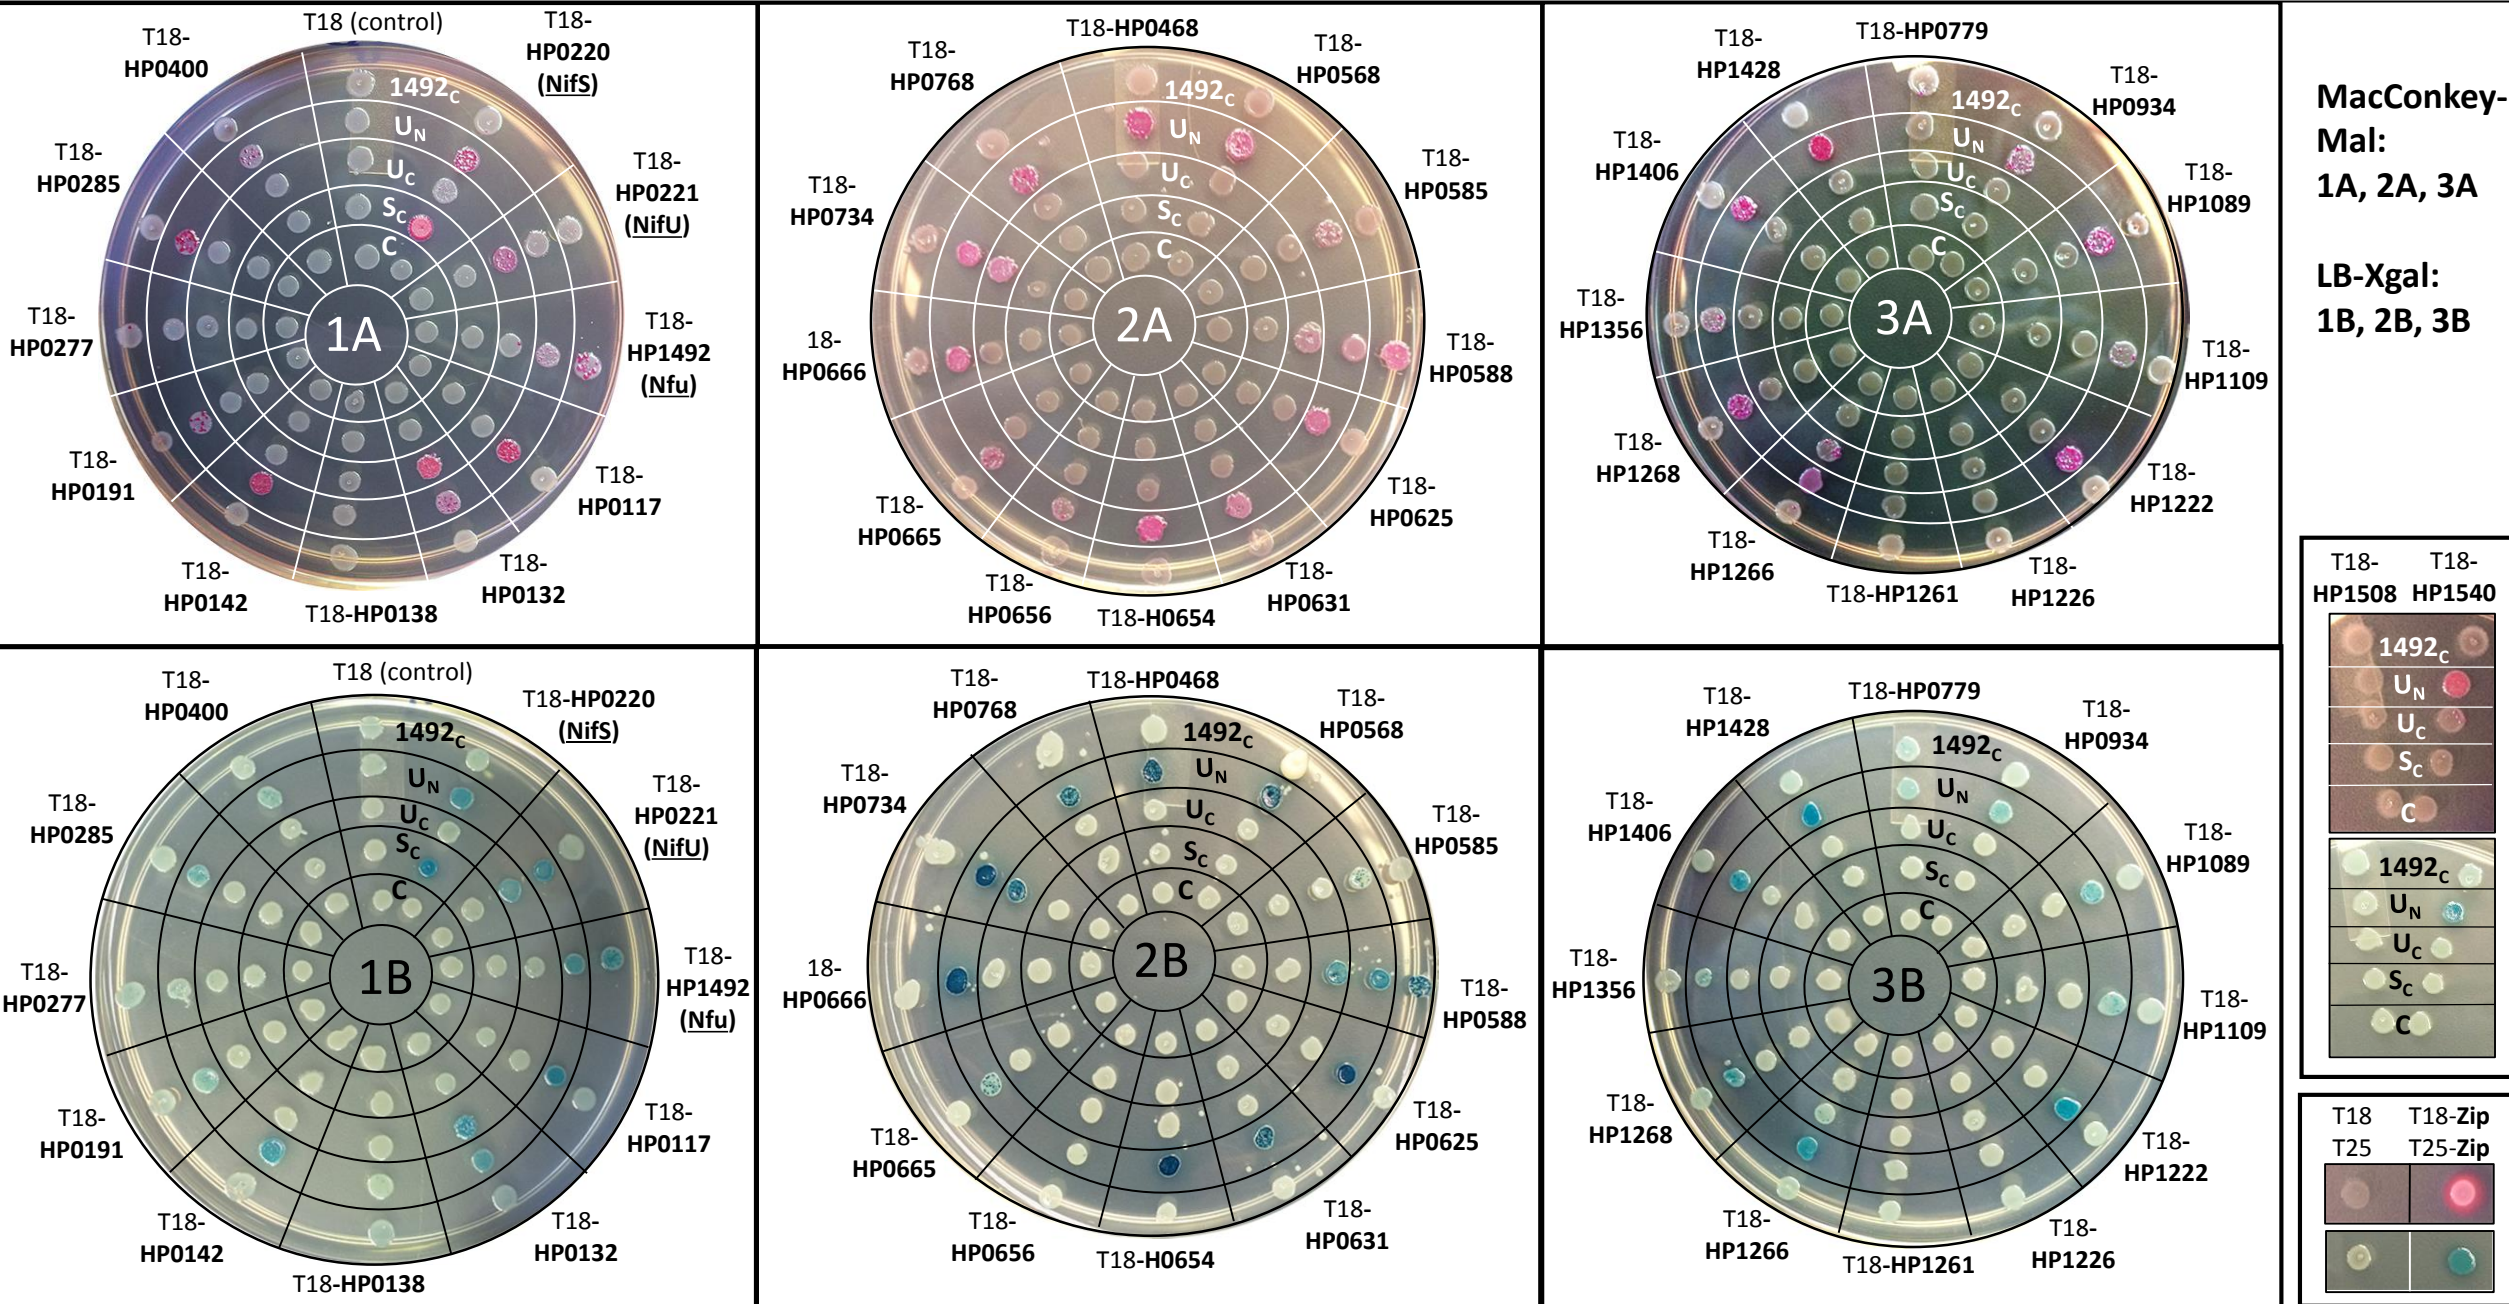

Fig. S1 Keys for each circle: C: T25 only (control) S<sub>C</sub>: T25-NifS U<sub>C</sub>: T25-NifU U<sub>N</sub>: NifU-T25 1492<sub>C</sub>: T25-HP1492 (Nfu)

Iron-sulfur protein maturation in *Helicobacter pylori*: identifying a Nfu-type cluster carrier protein and its iron-sulfur protein targets. (Benoit *et al.* 2018). Supplemental Figure S2: additional BACTH interactions.

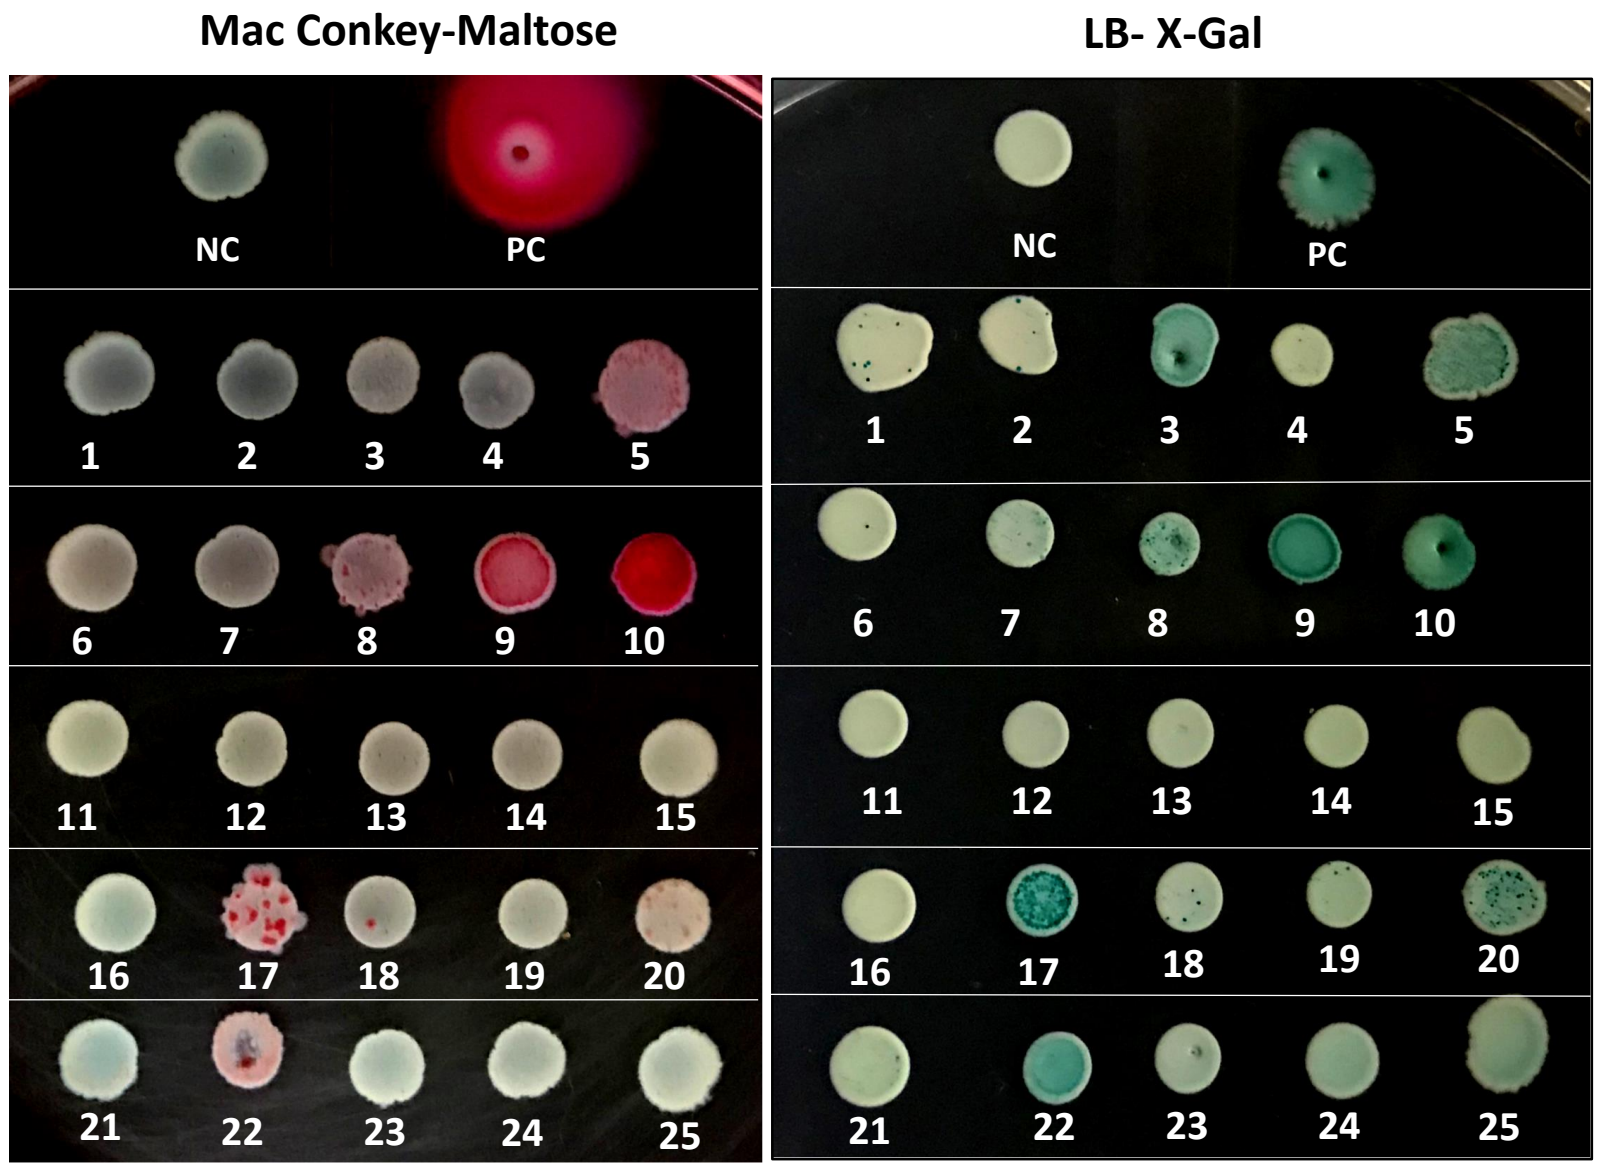

| #  | T18-Fusion protein | T25-Fusion protein |
|----|--------------------|--------------------|
| 1  | Nfu (HP1492)-T18   | T25                |
| 2  | Nfu (HP1492)-T18   | T25-NifS           |
| 3  | Nfu (HP1492)-T18   | T25-NifU           |
| 4  | Nfu (HP1492)-T18   | NifU-T25           |
| 5  | Nfu (HP1492)-T18   | T25-Nfu (HP1492)   |
| 6  | T18-HP0207         | T25                |
| 7  | T18-HP0207         | T25-NifS           |
| 8  | T18-HP0207         | T25-NifU           |
| 9  | T18-HP0207         | NifU-T25           |
| 10 | T18-HP0207         | T25-Nfu(HP1492)    |
| 11 | T18-HP0269         | T25                |
| 12 | T18-HP0269         | T25-NifS           |
| 13 | T18-HP0269         | T25-NifU           |
| 14 | T18-HP0269         | NifU-T25           |
| 15 | T18-HP0269         | T25-Nfu (HP1492)   |
| 16 | T18                | T25-AcnB (HP0779)  |
| 17 | T18-NifS           | T25-AcnB (HP0779)  |
| 18 | T18-NifU           | T25-AcnB (HP0779)  |
| 19 | T18-Nfu(HP1492)    | T25-AcnB (HP0779)  |
| 20 | Nfu (HP1492)-T18   | T25-AcnB (HP0779)  |
| 21 | T18                | AcnB (HP0779)-T25  |
| 22 | T18-NifS           | AcnB (HP0779)-T25  |
| 23 | T18-NifU           | AcnB (HP0779)-T25  |
| 24 | T18-Nfu(HP1492)    | AcnB (HP0779)-T25  |
| 25 | Nfu (HP1492)-T18   | AcnB (HP0779)-T25  |

NC: (kit) Negative Control (T18 only/T25 only ); PC: Positive Control (T18-zip/T25-zip)
