# Supplementary material
Source: PubMed Central journal article supplement (PMC5943153)
Supplement: NIHMS950097-supplement-Supp_TableS1-3.pdf [file NIHMS950097-supplement-Supp_TableS1-3.pdf]

**Supplementary material for Benoit *et al.*, 2018 (MMI-16779). Iron-sulfur protein maturation in *Helicobacter pylori*: identifying a Nfu-type cluster carrier protein and its iron-sulfur protein targets.**

**Tables S1, S2 and S3.**

**Table S1.** Strains and plasmids used in this study

| Strain or plasmid       | Relevant characteristics                                                                            | Source or reference             |
|-------------------------|-----------------------------------------------------------------------------------------------------|---------------------------------|
| <b><u>Strain</u></b>    |                                                                                                     |                                 |
| <b><u>E. coli</u></b>   |                                                                                                     |                                 |
| TOP10                   | Cloning strain                                                                                      | Invitrogen                      |
| Rosetta (DE3) RIL       | BL21 derivative. Host for protein overproduction; Cm <sup>r</sup>                                   | Novagen                         |
| BTH101                  | <i>cya-99</i> mutant. Host for bacterial adenylate cyclase-based two hybrid                         | (Karimova <i>et al.</i> , 1998) |
| <b><u>H. pylori</u></b> |                                                                                                     |                                 |
| 26695                   | Parental strain                                                                                     | (Tomb <i>et al.</i> , 1997)     |
| 26695 <i>Anfu</i>       | 26695 with <i>Δhp1492::cat</i> ; Cm <sup>r</sup>                                                    | This study                      |
| 43504                   | Parental strain                                                                                     | ATCC                            |
| 43504 <i>Anfu</i>       | 43504 with <i>Δhp1492::cat</i> ; Cm <sup>r</sup>                                                    | This study                      |
| X-47                    | Parental, mouse colonizing strain                                                                   | (Veyrier <i>et al.</i> , 2013)  |
| X47 <i>Anfu</i>         | X47 with <i>Δhp1492::cat</i> ; Cm <sup>r</sup>                                                      | This study                      |
| SLB1355                 | 43504 with pILL- <i>nifU</i> ; Cm <sup>r</sup>                                                      | This study                      |
| SLB1372                 | SLB1355 with <i>ΔnifU::aphA3</i> ; conditional <i>nifU</i> mutant; Cm <sup>r</sup> Kan <sup>r</sup> | This study                      |
| <b><u>Plasmid</u></b>   |                                                                                                     |                                 |
| pET21b                  | Cloning and expression vector; Amp <sup>r</sup>                                                     | Invitrogen                      |
| pET-Nfu                 | pET21b with <i>hp1492 (nfu)</i> ORF cloned at <i>NdeI-XhoI</i> ; Amp <sup>r</sup>                   | This study                      |
| pET-NifS                | pET21b with <i>hp0220 (nifS)</i> ORF cloned at <i>NdeI-BamHI</i> ; Amp <sup>r</sup>                 | (Olson <i>et al.</i> , 2000)    |
| pET-NifU                | pET21b with <i>hp0221 (nifU)</i> ORF cloned at <i>NdeI-EcoRI</i> ; Amp <sup>r</sup>                 | (Olson <i>et al.</i> , 2000)    |
| pUC20-cat               | Source of <i>cat</i> cassette; Cm <sup>r</sup>                                                      | (Wang and Taylor, 1990)         |
| pBC-Kan                 | Source of <i>aphA3</i> cassette; Kan <sup>r</sup>                                                   | (Taylor <i>et al.</i> , 1988)   |
| pILL2150                | <i>E. coli-H. pylori</i> shuttle plasmid; Cm <sup>r</sup>                                           | (Boneca <i>et al.</i> , 2008)   |
| pILL- <i>nifU</i>       | pILL2150 with <i>hp0221 (nifU)</i> ORF cloned at <i>NdeI-BamHI</i> ; Cm <sup>r</sup>                | This study                      |
| pKT25                   | BACTH; allows for C-terminal fusions to T25 fragment of CyaA; Kan <sup>r</sup>                      | (Karimova <i>et al.</i> , 1998) |
| pKNT25                  | BACTH; allows for N-terminal fusions to T25 fragment of CyaA; Kan <sup>r</sup>                      | (Karimova <i>et al.</i> , 1998) |
| pUT18                   | BACTH; allows for N-terminal fusions to T18 fragment of CyaA; Amp <sup>r</sup>                      | (Karimova <i>et al.</i> , 1998) |
| pUT18C                  | BACTH; allows for C-terminal fusions to T18 fragment of CyaA; Amp <sup>r</sup>                      | (Karimova <i>et al.</i> , 1998) |
| pKT25- <i>zip</i>       | pKT25 with <i>zip</i> gene; positive control for BACTH; Kan <sup>r</sup>                            | (Karimova <i>et al.</i> , 1998) |
| pUT18C- <i>zip</i>      | pUT18C with <i>zip</i> gene; positive control for BACTH; Amp <sup>r</sup>                           | (Karimova <i>et al.</i> , 1998) |
| pKT25- <i>nifS</i>      | pKT25 with <i>hp0220 (nifS)</i> ORF cloned at <i>XbaI-KpnI</i> ; Kan <sup>r</sup>                   | This study                      |
| pKT25- <i>nifU</i>      | pKT25 with <i>hp0221 (nifU)</i> , ORF cloned at <i>XbaI-KpnI</i> ; Kan <sup>r</sup>                 | This study                      |

|                       |                                                                                             |            |
|-----------------------|---------------------------------------------------------------------------------------------|------------|
| pKT25- <i>nfu</i>     | pKT25 with <i>hp1492 (nfu)</i> ORF cloned at <i>XbaI- KpnI</i> ; Kan <sup>r</sup>           | This study |
| pKT25- <i>hp0779</i>  | pKT25 with <i>hp0779 (acnB)</i> ORF cloned at <i>XbaI- KpnI</i> ; Amp <sup>r</sup>          | This study |
| pKNT25- <i>nifU</i>   | pKNT25 with <i>hp1492 (nrfU)</i> ORF cloned at <i>XbaI- KpnI</i> ; Kan <sup>r</sup>         | This study |
| pKNT25- <i>nfu</i>    | pKNT25 with <i>hp1492 (nfu)</i> ORF cloned at <i>XbaI- KpnI</i> ; Kan <sup>r</sup>          | This study |
| pKNT25- <i>hp0779</i> | pKNT25 with <i>hp0779 (acnB)</i> ORF cloned at <i>XbaI- KpnI</i> ; Amp <sup>r</sup>         | This study |
| pUT18- <i>nfu</i>     | pUT18 with <i>hp1492 (nfu)</i> ORF cloned at <i>XbaI- KpnI</i> ; Amp <sup>r</sup>           | This study |
| pUT18C- <i>nifS</i>   | pUT18C with <i>hp0220 (nifS)</i> ORF cloned at <i>XbaI- KpnI</i> ; Amp <sup>r</sup>         | This study |
| pUT18C- <i>nifU</i>   | pUT18C with <i>hp0221 (nifU)</i> ORF cloned at <i>XbaI- KpnI</i> ; Amp <sup>r</sup>         | This study |
| pUT18C- <i>nfu</i>    | pUT18C with <i>hp1492 (nfu)</i> ORF cloned at <i>XbaI- KpnI</i> ; Amp <sup>r</sup>          | This study |
| pUT18C- <i>hp0117</i> | pUT18C with <i>hp0117</i> (hypothetical) ORF cloned at <i>PstI- KpnI</i> ; Amp <sup>r</sup> | This study |
| pUT18C- <i>hp0132</i> | pUT18C with <i>hp0132 (sdaA)</i> ORF cloned at <i>XbaI- KpnI</i> ; Amp <sup>r</sup>         | This study |
| pUT18C- <i>hp0138</i> | pUT18C with <i>hp0138</i> (hypothetical) ORF cloned at <i>XbaI- KpnI</i> ; Amp <sup>r</sup> | This study |
| pUT18C- <i>hp0142</i> | pUT18C with <i>hp0142 (mutY)</i> ORF cloned at <i>XbaI- KpnI</i> ; Amp <sup>r</sup>         | This study |
| pUT18C- <i>hp0191</i> | pUT18C with <i>hp0191 (frdA)</i> ORF cloned at <i>XbaI- KpnI</i> ; Amp <sup>r</sup>         | This study |
| pUT18C- <i>hp0207</i> | pUT18C with <i>hp0207 (apbC, mrp)</i> ORF cloned at <i>XbaI- KpnI</i> ; Amp <sup>r</sup>    | This study |
| pUT18C- <i>hp0269</i> | pUT18C with <i>hp0269 (miaB-like)</i> ORF cloned at <i>XbaI- KpnI</i> ; Amp <sup>r</sup>    | This study |
| pUT18C- <i>hp0277</i> | pUT18C with <i>hp0277 (ferredoxin)</i> ORF cloned at <i>XbaI- KpnI</i> ; Amp <sup>r</sup>   | This study |
| pUT18C- <i>hp0285</i> | pUT18C with <i>hp0285 (miaB)</i> ORF cloned at <i>XbaI- KpnI</i> ; Amp <sup>r</sup>         | This study |
| pUT18C- <i>hp0400</i> | pUT18C with <i>hp0400 (ispH)</i> ORF cloned at <i>XbaI- KpnI</i> ; Amp <sup>r</sup>         | This study |
| pUT18C- <i>hp0468</i> | pUT18C with <i>hp0468</i> (hypothetical) ORF cloned at <i>XbaI- KpnI</i> ; Amp <sup>r</sup> | This study |
| pUT18C- <i>hp0568</i> | pUT18C with <i>hp0568</i> (hypothetical) ORF cloned at <i>XbaI- KpnI</i> ; Amp <sup>r</sup> | This study |
| pUT18C- <i>hp0585</i> | pUT18C with <i>hp0585 (nth)</i> ORF cloned at <i>XbaI- KpnI</i> ; Amp <sup>r</sup>          | This study |
| pUT18C- <i>hp0588</i> | pUT18C with <i>hp0588 (oorD)</i> ORF cloned at <i>XbaI- KpnI</i> ; Amp <sup>r</sup>         | This study |
| pUT18C- <i>hp0625</i> | pUT18C with <i>hp0625(ispG)</i> ORF cloned at <i>XbaI- KpnI</i> ; Amp <sup>r</sup>          | This study |
| pUT18C- <i>hp0631</i> | pUT18C with <i>hp0631 (hydA)</i> ORF cloned at <i>XbaI- KpnI</i> ; Amp <sup>r</sup>         | This study |
| pUT18C- <i>hp0654</i> | pUT18C with <i>hp0654 (mqnD)</i> ORF cloned at <i>XbaI- KpnI</i> ; Amp <sup>r</sup>         | This study |
| pUT18C- <i>hp0656</i> | pUT18C with <i>hp0656 (mqnC)</i> ORF cloned at <i>XbaI- KpnI</i> ; Amp <sup>r</sup>         | This study |
| pUT18C- <i>hp0665</i> | pUT18C with <i>hp0665 (hemN)</i> ORF cloned at <i>XbaI- KpnI</i> ; Amp <sup>r</sup>         | This study |
| pUT18C- <i>hp0666</i> | pUT18C with <i>hp0666 (glpC)</i> ORF cloned at <i>XbaI- KpnI</i> ; Amp <sup>r</sup>         | This study |
| pUT18C- <i>hp0734</i> | pUT18C with <i>hp0734 (rimO)</i> ORF cloned at <i>XbaI- KpnI</i> ; Amp <sup>r</sup>         | This study |
| pUT18C- <i>hp0768</i> | pUT18C with <i>hp0768 (moaA)</i> ORF cloned at <i>XbaI- KpnI</i> ; Amp <sup>r</sup>         | This study |
| pUT18C- <i>hp0779</i> | pUT18C with <i>hp0779 (acnB)</i> ORF cloned at <i>XbaI- KpnI</i> ; Amp <sup>r</sup>         | This study |
| pUT18C- <i>hp0934</i> | pUT18C with <i>hp0934 (queE)</i> ORF cloned at <i>XbaI- KpnI</i> ; Amp <sup>r</sup>         | This study |
| pUT18C- <i>hp1089</i> | pUT18C with <i>hp1089 (addB)</i> ORF cloned at <i>XbaI- KpnI</i> ; Amp <sup>r</sup>         | This study |
| pUT18C- <i>hp1109</i> | pUT18C with <i>hp1109 (porD)</i> ORF cloned at <i>XbaI- KpnI</i> ; Amp <sup>r</sup>         | This study |
| pUT18C- <i>hp1222</i> | pUT18C with <i>hp1222 (dld)</i> ORF cloned at <i>XbaI- KpnI</i> ; Amp <sup>r</sup>          | This study |
| pUT18C- <i>hp1226</i> | pUT18C with <i>hp1226 (hemN)</i> ORF cloned at <i>XbaI- KpnI</i> ; Amp <sup>r</sup>         | This study |
| pUT18C- <i>hp1261</i> | pUT18C with <i>hp1261 (nuoB)</i> ORF cloned at <i>XbaI- KpnI</i> ; Amp <sup>r</sup>         | This study |
| pUT18C- <i>hp1266</i> | pUT18C with <i>hp1266 (nqoB)</i> ORF cloned at <i>XbaI- KpnI</i> ; Amp <sup>r</sup>         | This study |
| pUT18C- <i>hp1268</i> | pUT18C with <i>hp1268 (nuoI)</i> ORF cloned at <i>XbaI- KpnI</i> ; Amp <sup>r</sup>         | This study |
| pUT18C- <i>hp1356</i> | pUT18C with <i>hp1356 (nadA)</i> ORF cloned at <i>XbaI- KpnI</i> ; Amp <sup>r</sup>         | This study |
| pUT18C- <i>hp1406</i> | pUT18C with <i>hp1406 (bioB)</i> ORF cloned at <i>XbaI- KpnI</i> ; Amp <sup>r</sup>         | This study |

|                       |                                                                                            |            |
|-----------------------|--------------------------------------------------------------------------------------------|------------|
| pUT18C- <i>hp1428</i> | pUT18C with <i>hp1428</i> ( <i>rlmN</i> ) ORF cloned at XbaI- KpnI; Amp <sup>r</sup>       | This study |
| pUT18C- <i>hp1508</i> | pUT18C with <i>hp1508</i> ( <i>ferredoxin</i> ) ORF cloned at XbaI- KpnI; Amp <sup>r</sup> | This study |
| pUT18C- <i>hp1540</i> | pUT18C with <i>hp1540</i> ( <i>fbcF</i> ) ORF cloned at XbaI- KpnI; Amp <sup>r</sup>       | This study |

## References

- Boneca, I.G., Ecobichon, C., Chaput, C., Mathieu, A., Guadagnini, S., Prevost, M.C., *et al.* (2008). Development of inducible systems to engineer conditional mutants of essential genes of *Helicobacter pylori*. *Appl. Environ. Microbiol.* **74**(7): 2095-2102.
- Karimova, G., Pidoux, J., Ullmann, A. and Ladant, D. (1998). A bacterial two-hybrid system based on a reconstituted signal transduction pathway. *Proc Natl Acad Sci U S A* **95**(10): 5752-5756.
- Olson, J.W., Agar, J.N., Johnson, M.K. and Maier, R.J. (2000). Characterization of the NifU and NifS Fe-S cluster formation proteins essential for viability in *Helicobacter pylori*. *Biochemistry* **39**(51): 16213-16219.
- Taylor, D.E., Yan, W., Ng, L.K., Manavathu, E.K. and Courvalin, P. (1988). Genetic characterization of kanamycin resistance in *Campylobacter coli*. *Ann Inst Pasteur Microbiol* **139**(6): 665-676.
- Tomb, J.F., White, O., Kerlavage, A.R., Clayton, R.A., Sutton, G.G., Fleischmann, R.D., *et al.* (1997). The complete genome sequence of the gastric pathogen *Helicobacter pylori*. *Nature* **388**(6642): 539-547.
- Veyrier, F.J., Ecobichon, C. and Boneca, I.G. (2013). Draft Genome Sequence of Strain X47-2AL, a Feline *Helicobacter pylori* Isolate. *Genome Announc* **1**(6).
- Wang, Y. and Taylor, D.E. (1990). Chloramphenicol resistance in *Campylobacter coli*: nucleotide sequence, expression, and cloning vector construction. *Gene* **94**(1): 23-28.

**Table S2.** Primers used in this study

| Name            | Sequence (5'-3')*                      | Usage                                                  |
|-----------------|----------------------------------------|--------------------------------------------------------|
| NifU-NdeI       | aggaccatATGGCAAACATGATTTA              | Expression of <i>nifU</i> in pILL2150                  |
| NifU-BamHI      | gtcctggatccTCCTCAAATCGGTAA             | Expression of <i>nifU</i> in pILL2150                  |
| Nfu-NdeI        | aggaccatATGATAGAATTTAGCGATG            | Expression of <i>nfu</i> in pET21b                     |
| Nfu-XhoI        | cgaatctcgagATGCCTATAATCCTTAAAGC        | Expression of <i>nfu</i> in pET21b                     |
| $\Delta$ nifU-1 | AATGGCAGGCGCAGCGGGAC                   | Construction of <i>AnifU::aphA3</i> conditional mutant |
| $\Delta$ nifU-2 | gtataacatagtagcgaCTTTGCCATTTTGATTCC    | Construction of <i>AnifU::aphA3</i> conditional mutant |
| $\Delta$ nifU-3 | gaattgttttagtagcgaGGTGTACCGATTTGAA     | Construction of <i>AnifU::aphA3</i> conditional mutant |
| $\Delta$ nifU-4 | ACGGGGTTTTGGTTTTGTCC                   | Construction of <i>AnifU::aphA3</i> conditional mutant |
| $\Delta$ nfu-1  | CAGGCGAAACGATACGGCCC                   | Construction of <i>Anfu::cat</i> mutant                |
| $\Delta$ nfu-2  | atccactttcaatctatcATAATGAGCCATTTTTATC  | Construction of <i>Anfu::cat</i> mutant                |
| $\Delta$ nfu-3  | cccagtttgcgactgataaTAAGCTTTAAGGATTATAG | Construction of <i>Anfu::cat</i> mutant                |
| $\Delta$ nfu-4  | ATCACCTAGAGCTGAACATC                   | Construction of <i>Anfu::cat</i> mutant                |

|             |                                     |                         |
|-------------|-------------------------------------|-------------------------|
| NifS-Xba    | agtactctagagTTACAACGAATTTATTTAG     | NifS fusion for BACTH   |
| NifS-Kpn    | agcacggtaccgaATAAGAGCTTGAAATATTTTC  | NifS fusion for BACTH   |
| NifU-Xba    | agtactctagagGCAAAACATGATTTAGTG      | NifU fusion for BACTH   |
| NifU-Kpn    | agcacggtaccgaAATCGGTAACACCCTG       | NifU fusion for BACTH   |
| Nfu-Xba     | agtactctagagATAGAATTTAGCGATGAAG     | Nfu fusion for BACTH    |
| Nfu-Kpn     | agcacggtaccgaAAGCTTATCAAACCTCTTAG   | Nfu fusion for BACTH    |
| HP0117-PstI | agtactctgagGCTAAAGAAAATCCGCC        | HP0117 fusion for BACTH |
| HP0117-KpnI | agcacggtaccgaAAACGCGCAATAAAACTCC    | HP0117 fusion for BACTH |
| HP0132-Xba  | agtactctagagGCTAGTTTTTCTATTTTATC    | HP0132 fusion for BACTH |
| HP0132-Kpn  | agcacggtaccgaGCATTTTAAGGTTTTGGC     | HP0132 fusion for BACTH |
| HP0138-Xba  | agtactctagagGAAAAATACCATAGCGACC     | HP0138 fusion for BACTH |
| HP0138-Kpn  | agcacggtaccgaCTCATAAATCACCCCTTCTAAG | HP0138 fusion for BACTH |
| HP0142-Xba  | agtactctagagGAAACTTTACACAACGCC      | HP0142 fusion for BACTH |
| HP0142-Kpn  | agcacggtaccgaACCCCAAATAAATTTTTTTG   | HP0142 fusion for BACTH |
| Hp0191-Xba  | agtactctagagAGTGATAATGAACGAACG      | HP0191 fusion for BACTH |
| Hp0191-Kpn  | agcacggtaccgaGCGGCTTTTACCCACTTTC    | HP0191 fusion for BACTH |
| Hp0207-Xba  | agtactctagagCTCACCCAAGAAGATGTC      | HP0207 fusion for BACTH |
| Hp0207-Kpn  | agcacggtaccgaATGCGAGCAAGCATGGGT     | HP0207 fusion for BACTH |
| Hp0269-Xba  | agtactctagagAAAGTTTATATTGAAACCATG   | HP0269 fusion for BACTH |
| Hp0269-Kpn  | agcacggtaccgaGTTGCCTTTAGTGGCCGCAT   | HP0269 fusion for BACTH |
| Hp0277-Xba  | agtactctagagTCATTATTGGTGAATGATG     | HP0277 fusion for BACTH |
| Hp0277-Kpn  | agcacggtaccgaATCTTGCTCTTTTAAGC      | HP0277 fusion for BACTH |
| HP0285-Xba  | agtactctagagAAAAAAGTCTATTTCAAAC     | HP0285 fusion for BACTH |
| HP0285-Kpn  | agcacggtaccgaGAAAACGGCATGATTTTCCC   | HP0285 fusion for BACTH |
| HP0400-Xba  | agtactctagagGAAATTAAAATGGCTAAGG     | HP0400 fusion for BACTH |
| HP0400-Kpn  | agcacggtaccgaAATCGTGCTGATTTTTTGC    | HP0400 fusion for BACTH |
| HP0468-Xba  | agtactctagagAGCGTTTTGAAATTGCATG     | HP0468 fusion for BACTH |
| HP0468-Kpn  | agcacggtaccgaAATGAAAGTAACCTTATG     | HP0468 fusion for BACTH |
| HP0568-Xba  | agtactctagagCCTTTGGAATTATTTGAAAAAG  | HP0568 fusion for BACTH |
| HP0568-Kpn  | agcacggtaccgaTTTTTTATAACGAATGAGAG   | HP0568 fusion for BACTH |
| Hp0585-Xba  | agtactctagagAAAATGGGTTTAAAACG       | HP0585 fusion for BACTH |
| Hp0585-Kpn  | agcacggtaccgaCGCTTTAAAGCTAGCTTTAG   | HP0585 fusion for BACTH |
| HP0588-Xba  | agtactctagagGCTAAAATGAGCGCTCCAG     | HP0588 fusion for BACTH |
| HP0588-Kpn  | agcacggtaccgaTTTGTCTCTCCCTTCTAAA    | HP0588 fusion for BACTH |
| HP0625-Xba  | agtactctagagCTAGAAAATAGAGTTAAGAC    | HP0625 fusion for BACTH |
| HP0625-Kpn  | agcacggtaccgaATCCTTTAAACTTTTTTCTC   | HP0625 fusion for BACTH |
| Hp0631-Xba  | agtactctagagTTCTACGATGAAAAAAG       | HP0631 fusion for BACTH |
| Hp0631-Kpn  | agcacggtaccgaCTCTTTGTTTTTGATCG      | HP0631 fusion for BACTH |
| HP0654-Xba  | agtactctagagGACTTTTTAGAAAAAGTATT    | HP0654 fusion for BACTH |
| HP0654-Kpn  | agcacggtaccGAAAATTTCTGTATAAAATTAT   | HP0654 fusion for BACTH |
| HP0656-Xba  | agtactctagagGCAAGAAATGTAAAGGGCTA    | HP0656 fusion for BACTH |
| HP0656-Kpn  | agcacggtaccgaTACCTTTGCTTTAGCCGGAT   | HP0656 fusion for BACTH |

|            |                                              |                         |
|------------|----------------------------------------------|-------------------------|
| HP0665-Xba | agtact <b>tctagag</b> CAAACCATTGATTTTAAAA    | HP0665 fusion for BACTH |
| HP0665-kpn | agcac <b>ggtaccga</b> TAGCGTTTTACTGAAATGTT   | HP0665 fusion for BACTH |
| HP0666-Xba | agtact <b>tctagag</b> AATGAAAATATTAATGAAAA   | HP0666 fusion for BACTH |
| HP0666-Kpn | agcac <b>ggtaccga</b> TTCAGCGCTTTTAAAGGC     | HP0666 fusion for BACTH |
| HP0734-Xba | agtact <b>tctagag</b> CAAGTTAAAGAAAACAAAC    | HP0734 fusion for BACTH |
| HP0734-Kpn | agcac <b>ggtaccga</b> AAAAGGGCTTAAACCTTAGC   | HP0734 fusion for BACTH |
| HP0768-Xba | agtact <b>tctagag</b> TTAGTAGATAGTTTTAATAG   | HP0768 fusion for BACTH |
| HP0768-Kpn | agcac <b>ggtaccga</b> CCCCCTGTGTAGTAAACG     | HP0768 fusion for BACTH |
| HP0779-Xba | agtact <b>tctagag</b> ATGAAAGATTTTTTAGAAG    | HP0779 fusion for BACTH |
| HP0779-Kpn | agcac <b>ggtaccga</b> GAGCCTGAAATCTCCATTAAG  | HP0779 fusion for BACTH |
| HP0934-Xba | agtact <b>tctagag</b> AAACTCCCGGTCGTTGAGAG   | HP0934 fusion for BACTH |
| HP0934-Kpn | agcac <b>ggtaccga</b> AAACCCTTTTGATTATCCC    | HP0934 fusion for BACTH |
| HP1089-Xba | agtact <b>tctagag</b> AACTTAGAAAACTTTTTTTAG  | HP1089 fusion for BACTH |
| HP1089-Kpn | agcac <b>ggtaccga</b> TCGGTTGCACATGTCTTTAA   | HP1089 fusion for BACTH |
| HP1109-Xba | agtact <b>tctagag</b> AAAGATTGGAACGAATTTG    | HP1109 fusion for BACTH |
| HP1109-Kpn | agcac <b>ggtaccga</b> TGATTTTTTCTTTTCTTG     | HP1109 fusion for BACTH |
| HP1222-Xba | agtact <b>tctagag</b> CGTGTGGAAGAAAATTATC    | HP1222 fusion for BACTH |
| HP1222-Kpn | agcac <b>ggtaccga</b> AAGCGTGCAAGCATCCACTA   | HP1222 fusion for BACTH |
| HP1226-Xba | agtact <b>tctagag</b> AAAATGAGAGAAATAAATATG  | HP1226 fusion for BACTH |
| HP1226-Kpn | agcac <b>ggtaccga</b> TAACAGCCACAAAGCC       | HP1226 fusion for BACTH |
| HP1261-Xba | agtact <b>tctagag</b> CAACAAGCACCGGTTGTTC    | HP1261 fusion for BACTH |
| HP1261-Kpn | agcac <b>ggtaccga</b> CACTAACCTTTGGGAGCGTC   | HP1261 fusion for BACTH |
| HP1266-Xba | agtact <b>tctagag</b> ATCACAATGAATATCAATGG   | HP1266 fusion for BACTH |
| HP1266-Kpn | agcac <b>ggtaccga</b> TGCTTGCTCCTTTAAATCCAC  | HP1266 fusion for BACTH |
| HP1268-Xba | agtact <b>tctagag</b> GCCAAACAAGAATACAAGC    | HP1268 fusion for BACTH |
| HP1268-Kpn | agcac <b>ggtaccga</b> AACATTTTCATCTCCCTTATTG | HP1268 fusion for BACTH |
| HP1356-Xba | agtact <b>tctagag</b> CCAAGTATAACGATTTAAAAG  | HP1356 fusion for BACTH |
| HP1356-Kpn | agcac <b>ggtaccga</b> AGATAACTCCATCATTTTAG   | HP1356 fusion for BACTH |
| HP1406-Xba | agtact <b>tctagag</b> CAAGAGATTTTTTTATGTTC   | HP1406 fusion for BACTH |
| HP1406-Kpn | agcac <b>ggtaccga</b> ATGACAGCTTGTCGCCATTGTC | HP1406 fusion for BACTH |
| HP1428-Xba | agtact <b>tctagag</b> AAAGCTAGTATTTATGATTTTC | HP1428 fusion for BACTH |
| HP1428-Kpn | agcac <b>ggtaccga</b> AATTTGCTGAGAGAGTTTTTTC | HP1428 fusion for BACTH |
| HP1508-Xba | agtact <b>tctagag</b> CTTGAAACTTCTAGCCATTT   | HP1508 fusion for BACTH |
| HP1508-Kpn | agcac <b>ggtaccga</b> ATCCTCACTTGGTGCAATAAAC | HP1508 fusion for BACTH |
| HP1540-Xba | agtact <b>tctagag</b> GCAGATATCAAAGGCGTG     | HP1540 fusion for BACTH |
| HP1540-Kpn | agcac <b>ggtaccga</b> CGCTTTAGCCATCATTTTC    | HP1540 fusion for BACTH |

\* Upper case letters indicate *H. pylori*-derived sequences; bold letters indicate newly generated restriction sites; *aphA3*-or *cat*-specific sequences are underlined. All primers were purchased from Integrated DNA Technology (IDT), Coralville, IA

**Table S3- Growth of co-transformed *E. coli* BTH101 cells in M63-maltose minimal medium: additional results.**

| FUSION PROTEIN 1 (in pUT18C or pUT18) |                             | Growth (OD <sub>595</sub> ) in M63 after 72h at 30°C (Mean ± SD, n=3-5) |                   |                   |
|---------------------------------------|-----------------------------|-------------------------------------------------------------------------|-------------------|-------------------|
|                                       |                             | FUSION PROTEIN 2 (in pKT25 or pKNT25)                                   |                   |                   |
| Fusion protein 1                      | <i>H. pylori</i> Protein ID | T25 only (control)                                                      | T25-HP0779 (AcnB) | HP0779-T25 (AcnB) |
| T18 only                              | None (neg. cont.)           | 0.04 ± 0.01                                                             | 0.05 ± 0.01       | 0.05 ± 0.01       |
| T18-HP0220                            | NifS                        | 0.03 ± 0.02                                                             | 0.25 ± 0.01       | 0.15 ± 0.03       |
| T18-HP0221                            | NifU                        | 0.02 ± 0.01                                                             | 0.06 ± 0.01       | 0.05 ± 0.01       |
| T18-HP1492                            | Nfu                         | 0.02 ± 0.01                                                             | 0.09 ± 0.03       | 0.04 ± 0.01       |
| HP1492-T18                            | Nfu                         | 0.05 ± 0.01                                                             | 0.14 ± 0.04       | 0.04 ± 0.01       |

| FUSION PROTEIN 1 (in pUT18) |                             | FUSION PROTEIN 2 (in pKT25 or pKNT25) |                   |                   |                  |
|-----------------------------|-----------------------------|---------------------------------------|-------------------|-------------------|------------------|
| Fusion protein 1            | <i>H. pylori</i> Protein ID | T25-HP0220 (NifS)                     | T25-HP0221 (NifU) | HP0221-T25 (NifU) | T25-HP1492 (NfU) |
| HP1492-T18                  | Nfu                         | 0.06 ± 0.01                           | 0.15 ± 0.07       | 0.07 ± 0.01       | 0.20 ± 0.05      |
| T18-Zip                     | T25-Zip                     | Interaction & Color key               | Not detectable    | Moderate          |                  |
| Positive control            | 0.31 ± 0.05                 |                                       | Weak              | Strong            |                  |
